# Supplementary material for: Genomic variations of the mevalonate pathway in porokeratosis
Source: PubMed Central journal article supplement (PMC4511816; doi:10.7554/elife.06322), 2015-07-23

**Figure 3-source data 1.**

Sanger sequencing chromatograms of normal control and PK patients at 48 mutation sites in *MVK*, *PMVK*, *MVD* and *FDPS*.

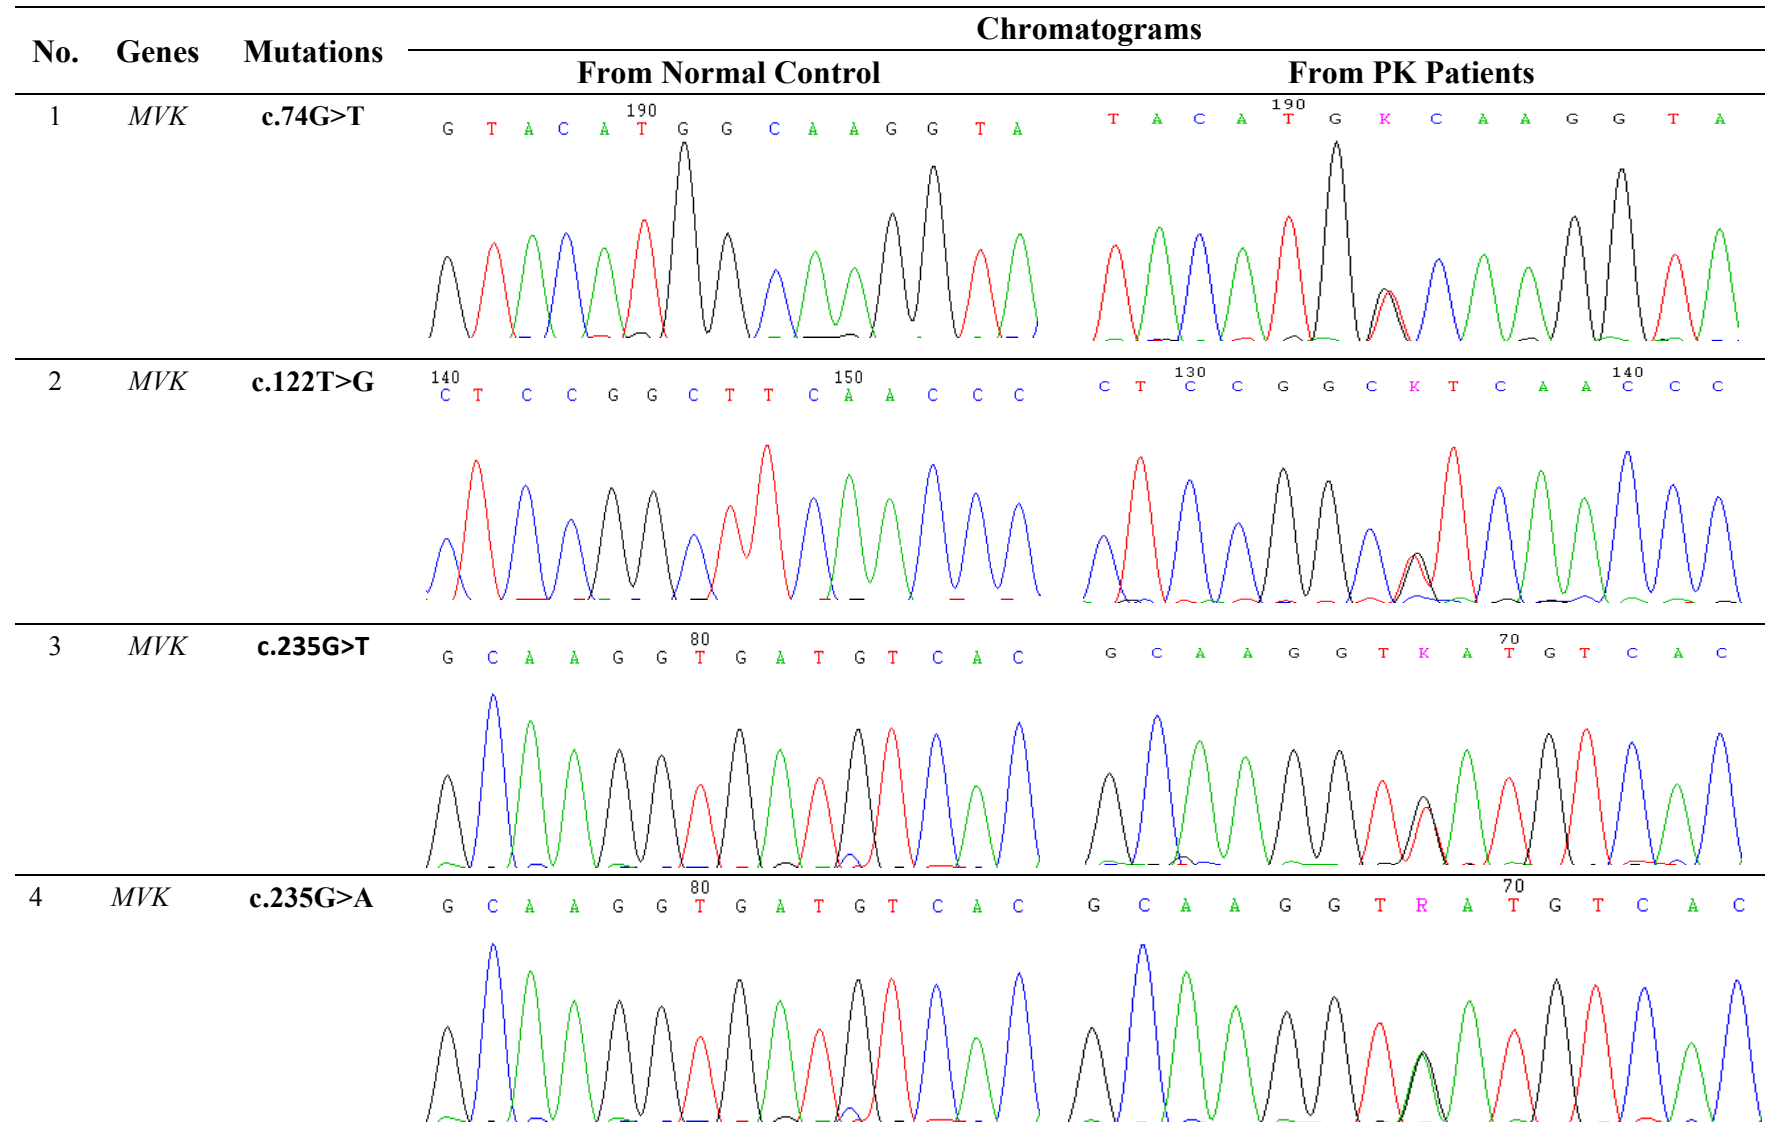

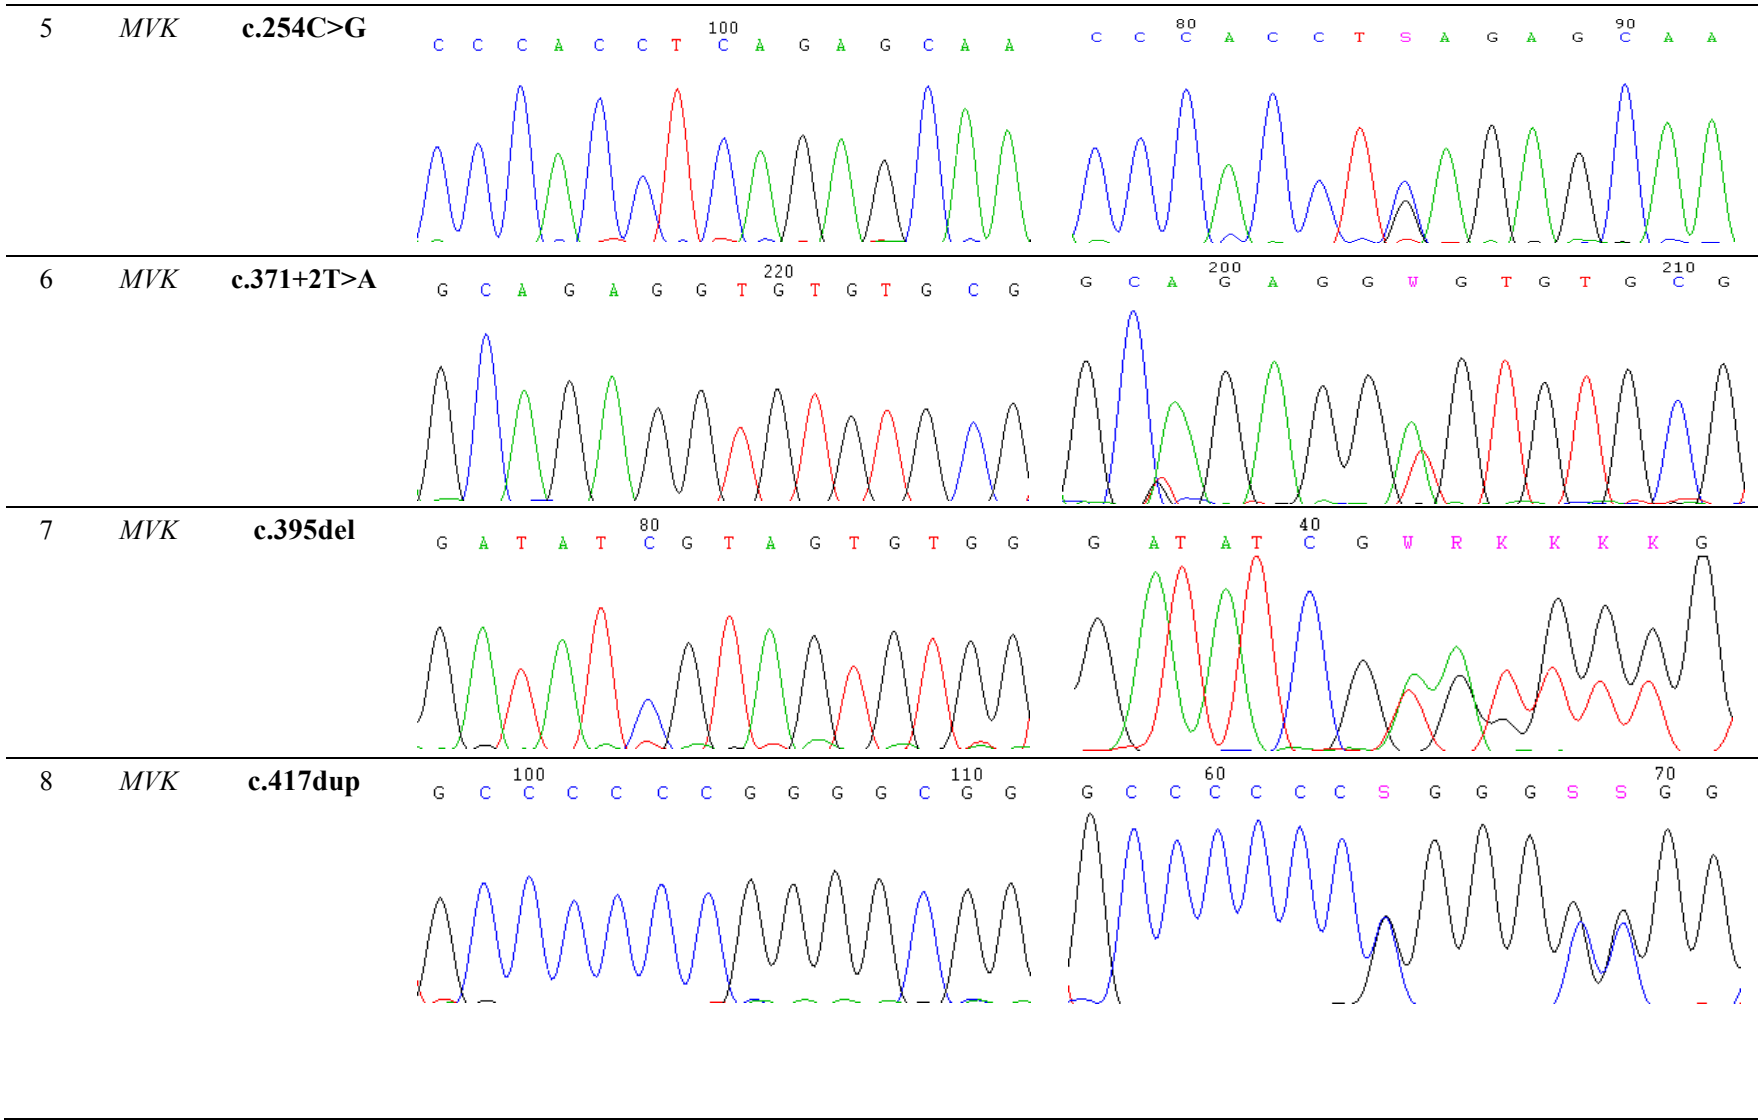

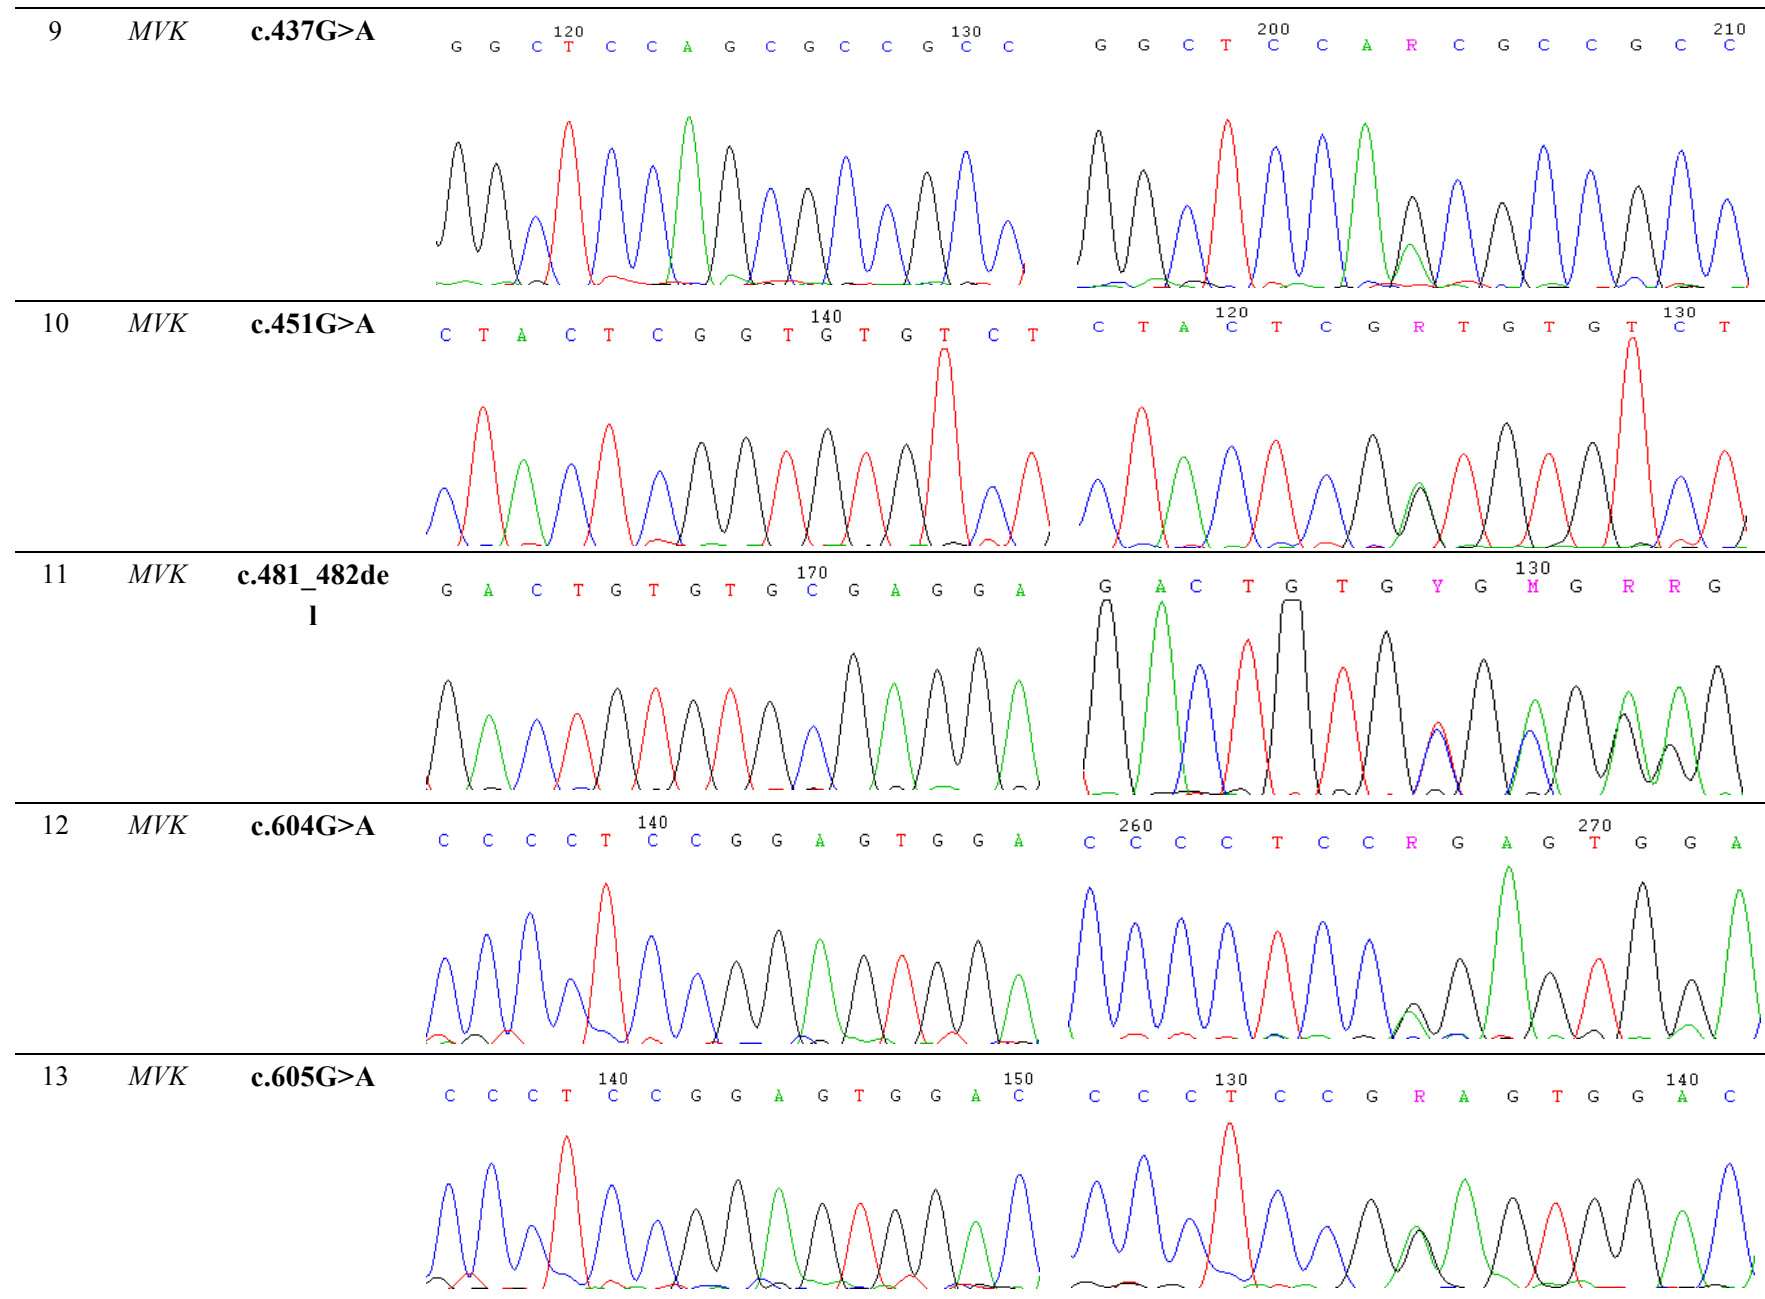

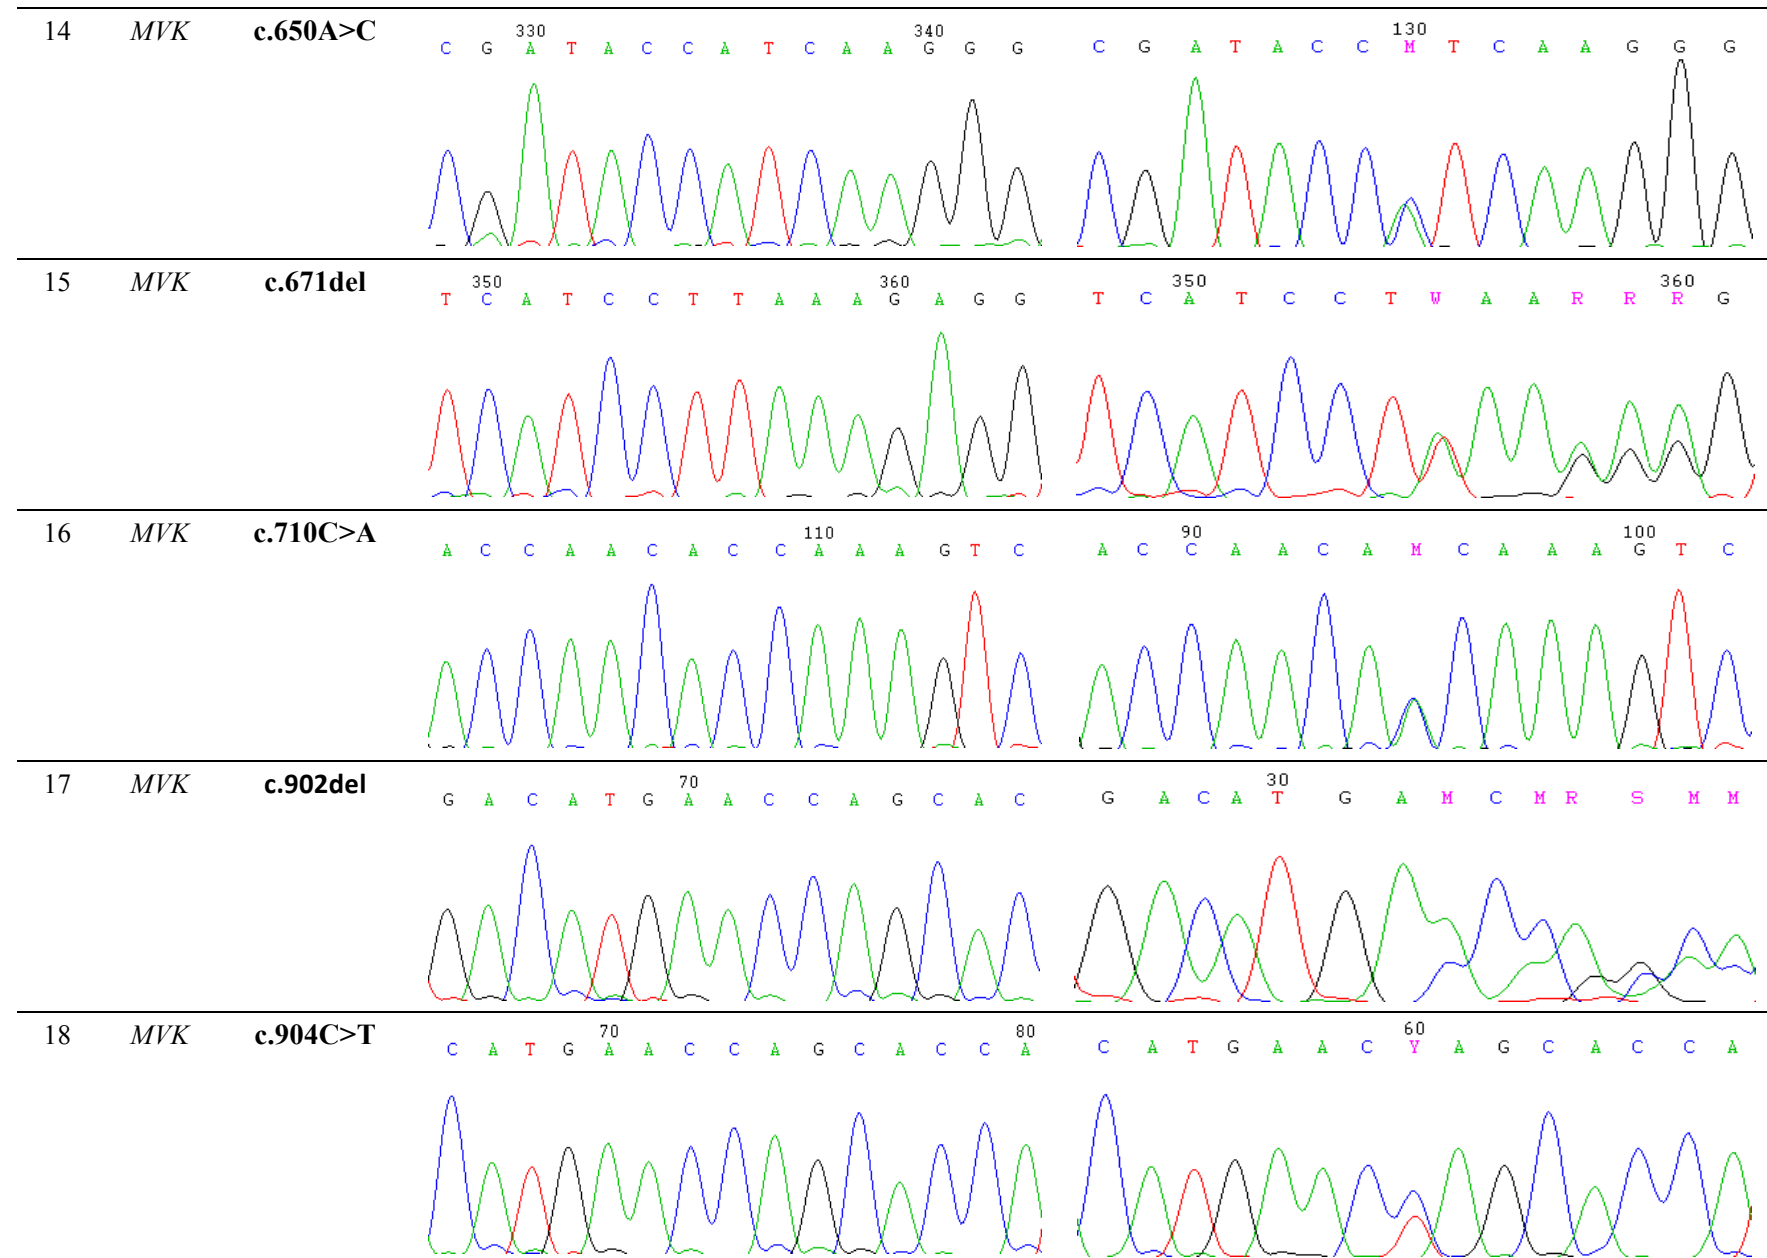

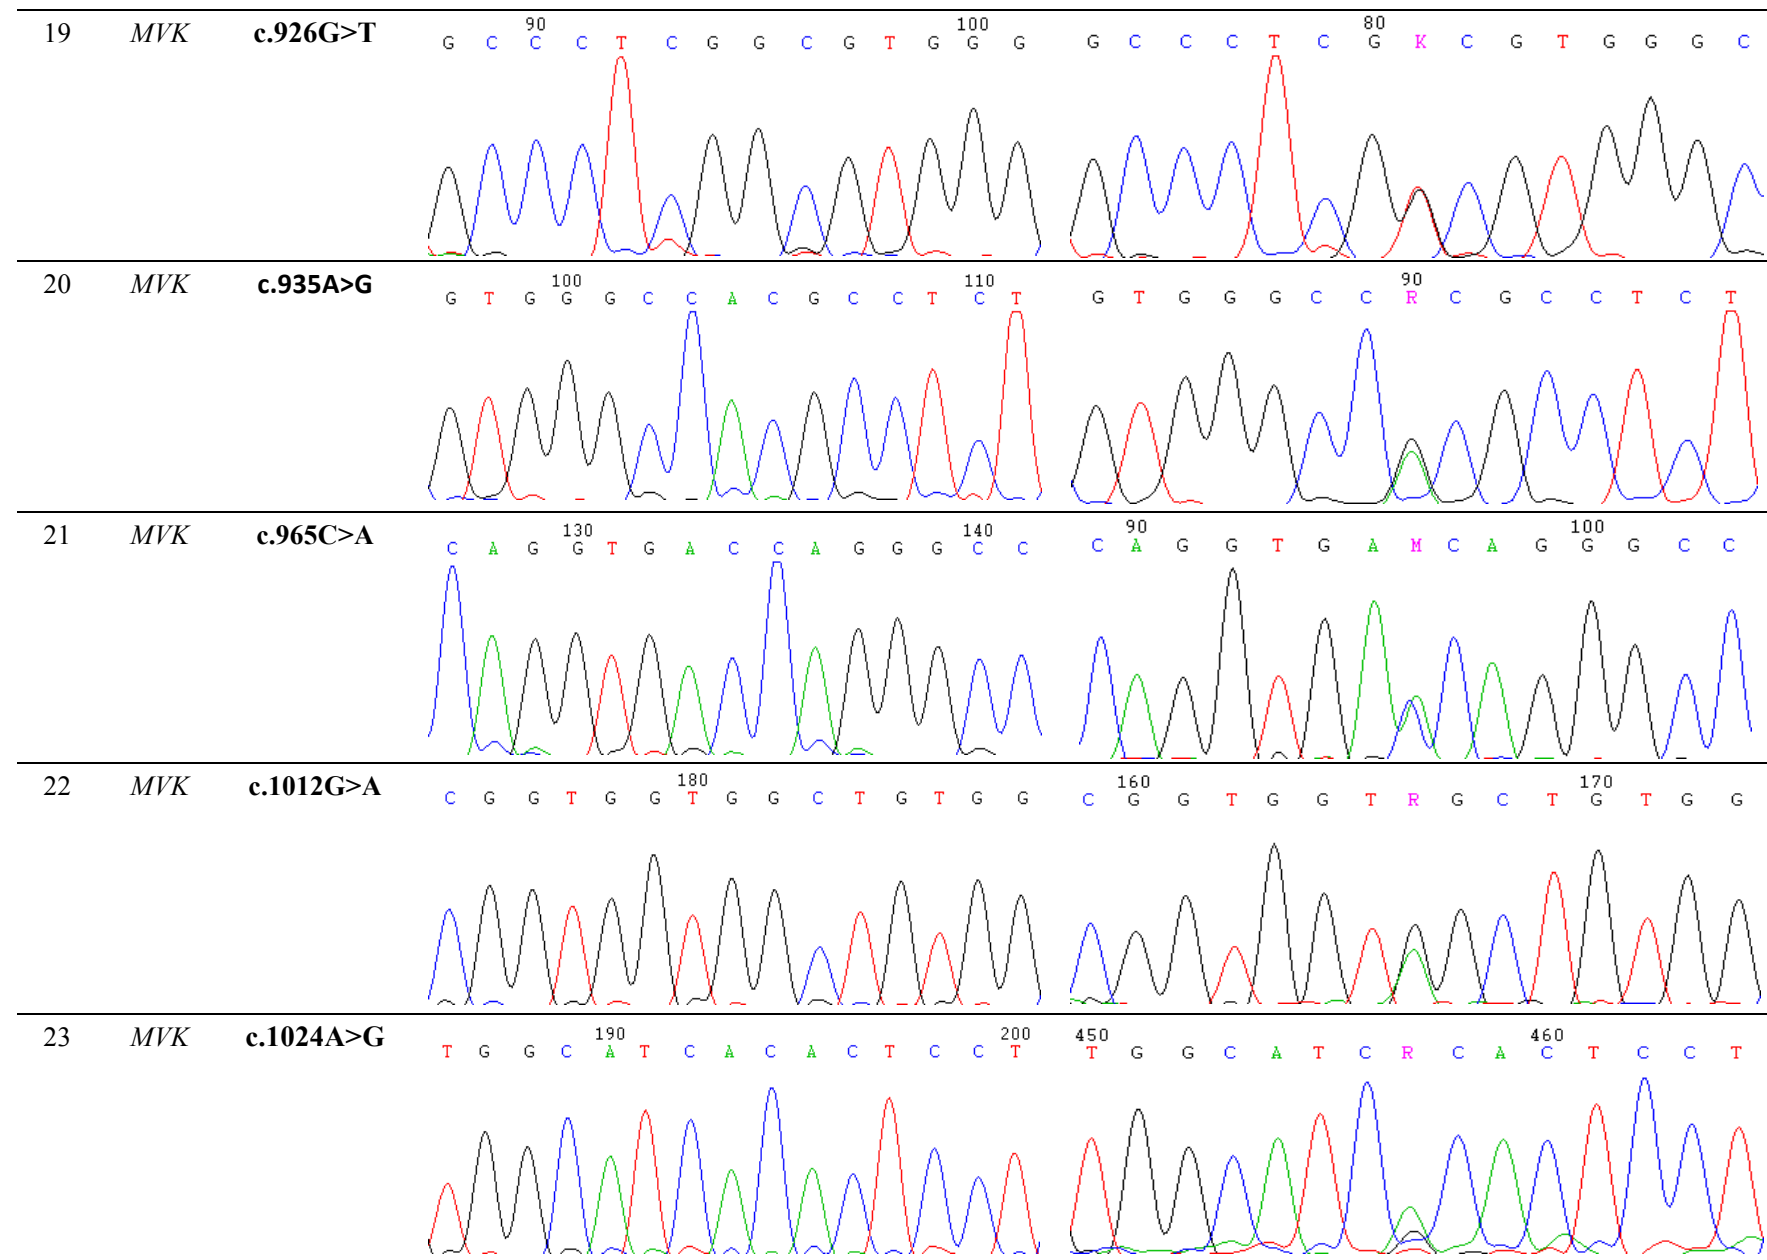

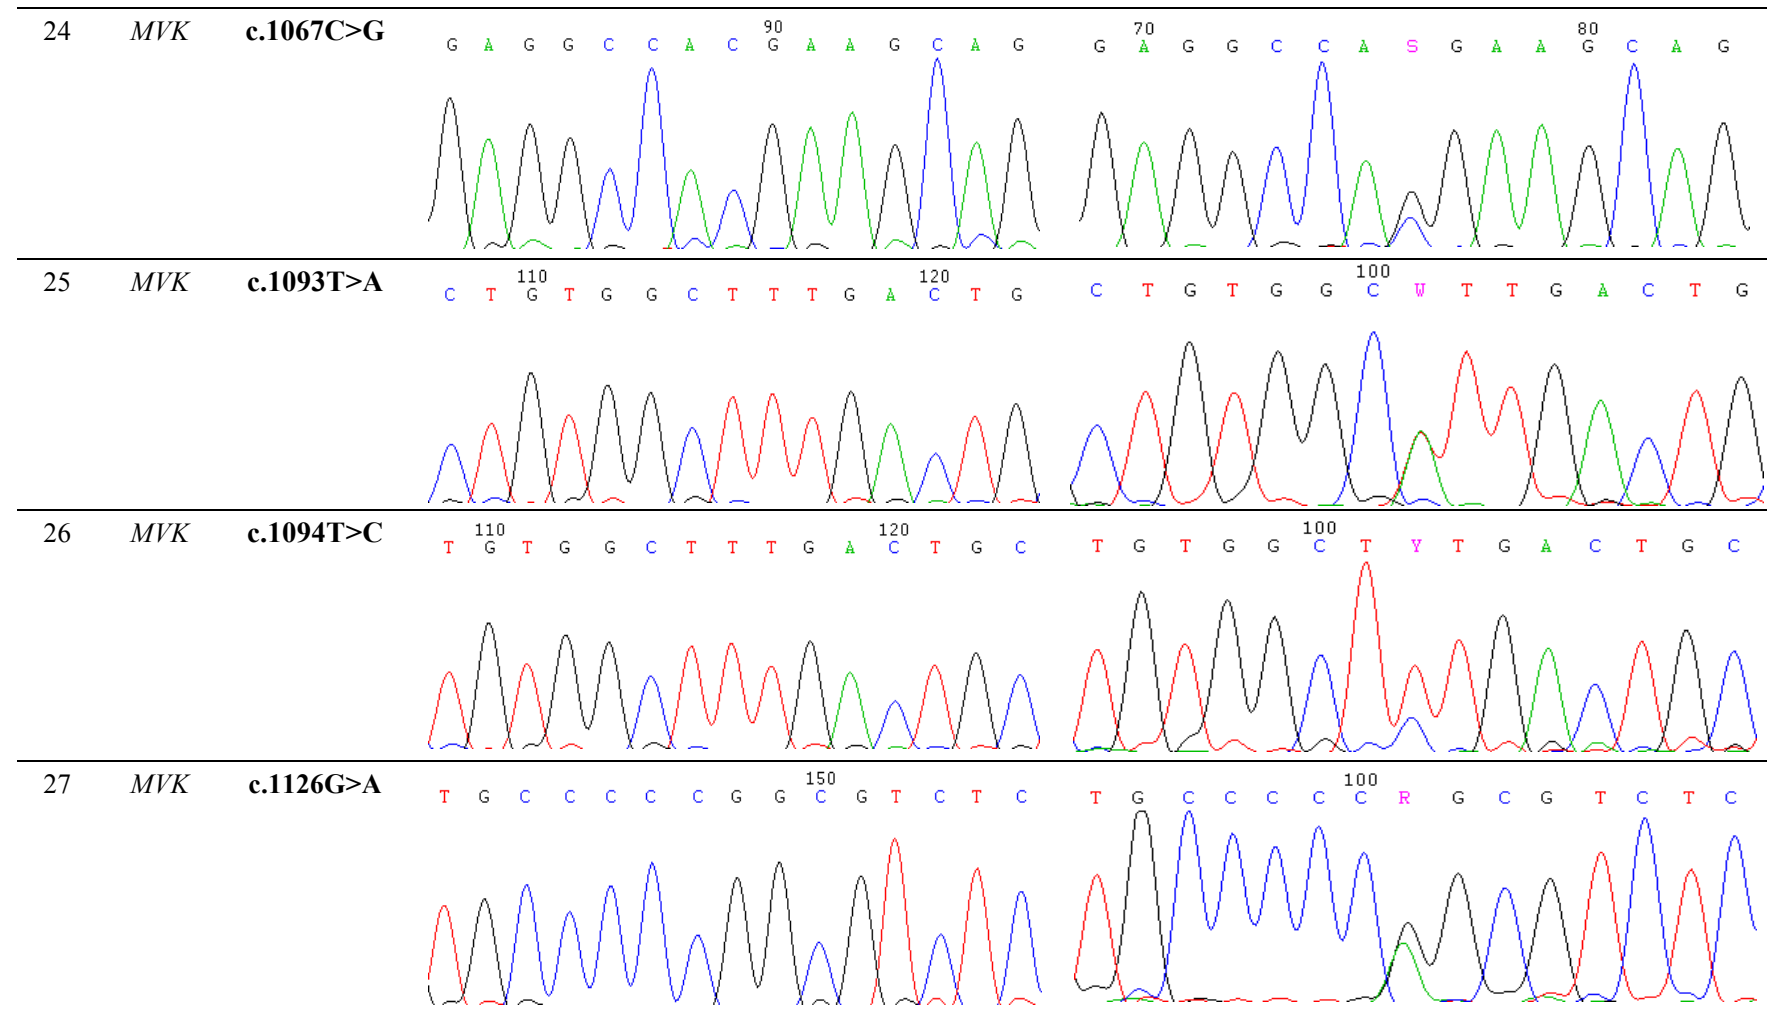

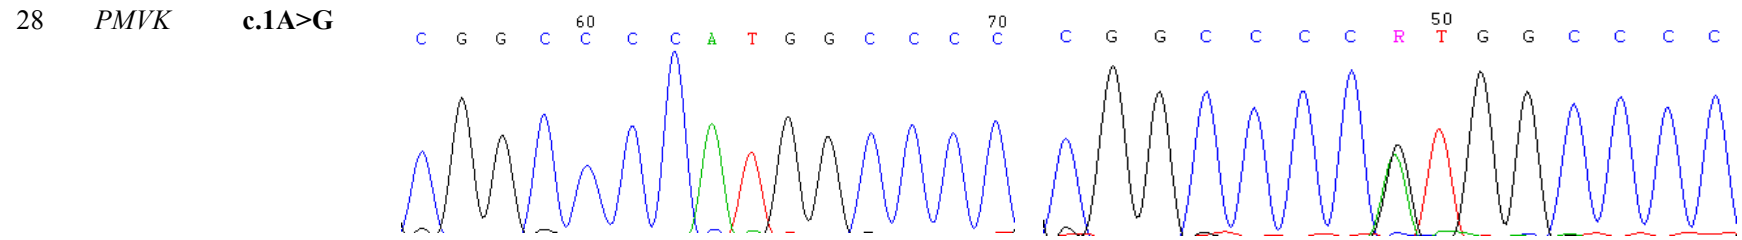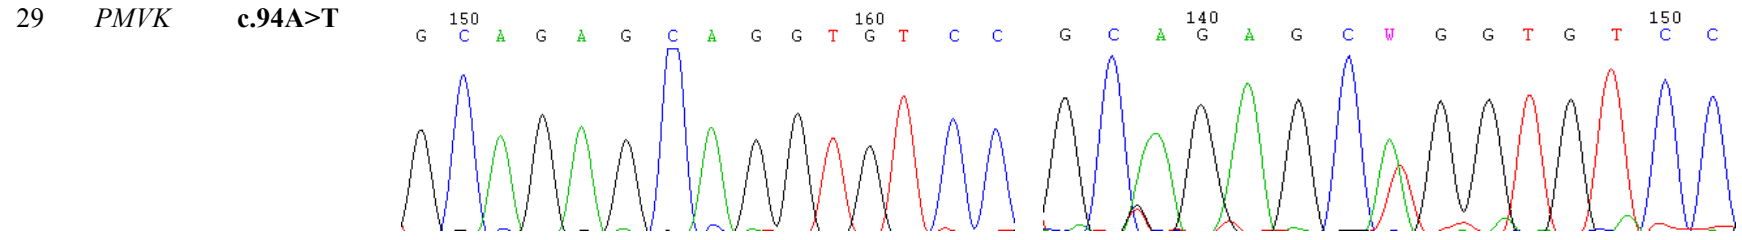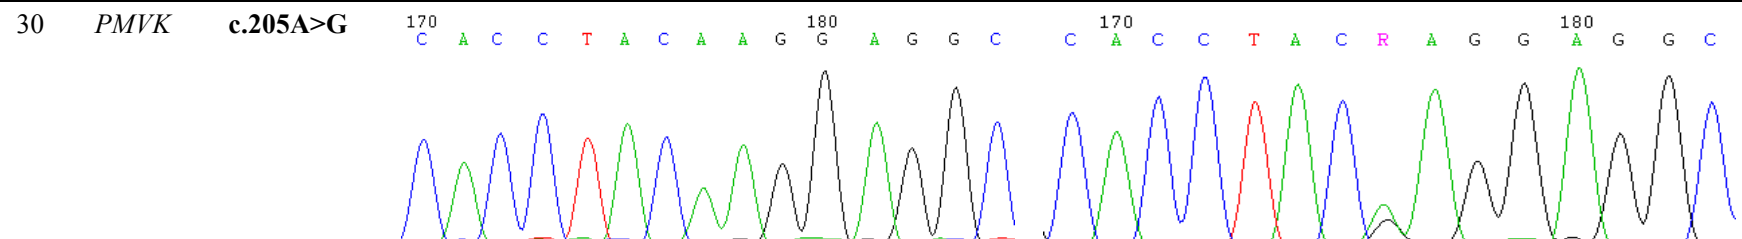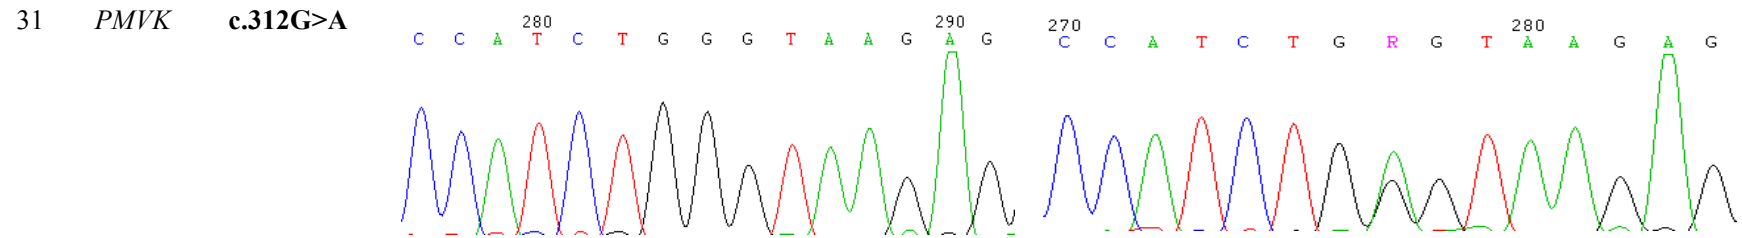

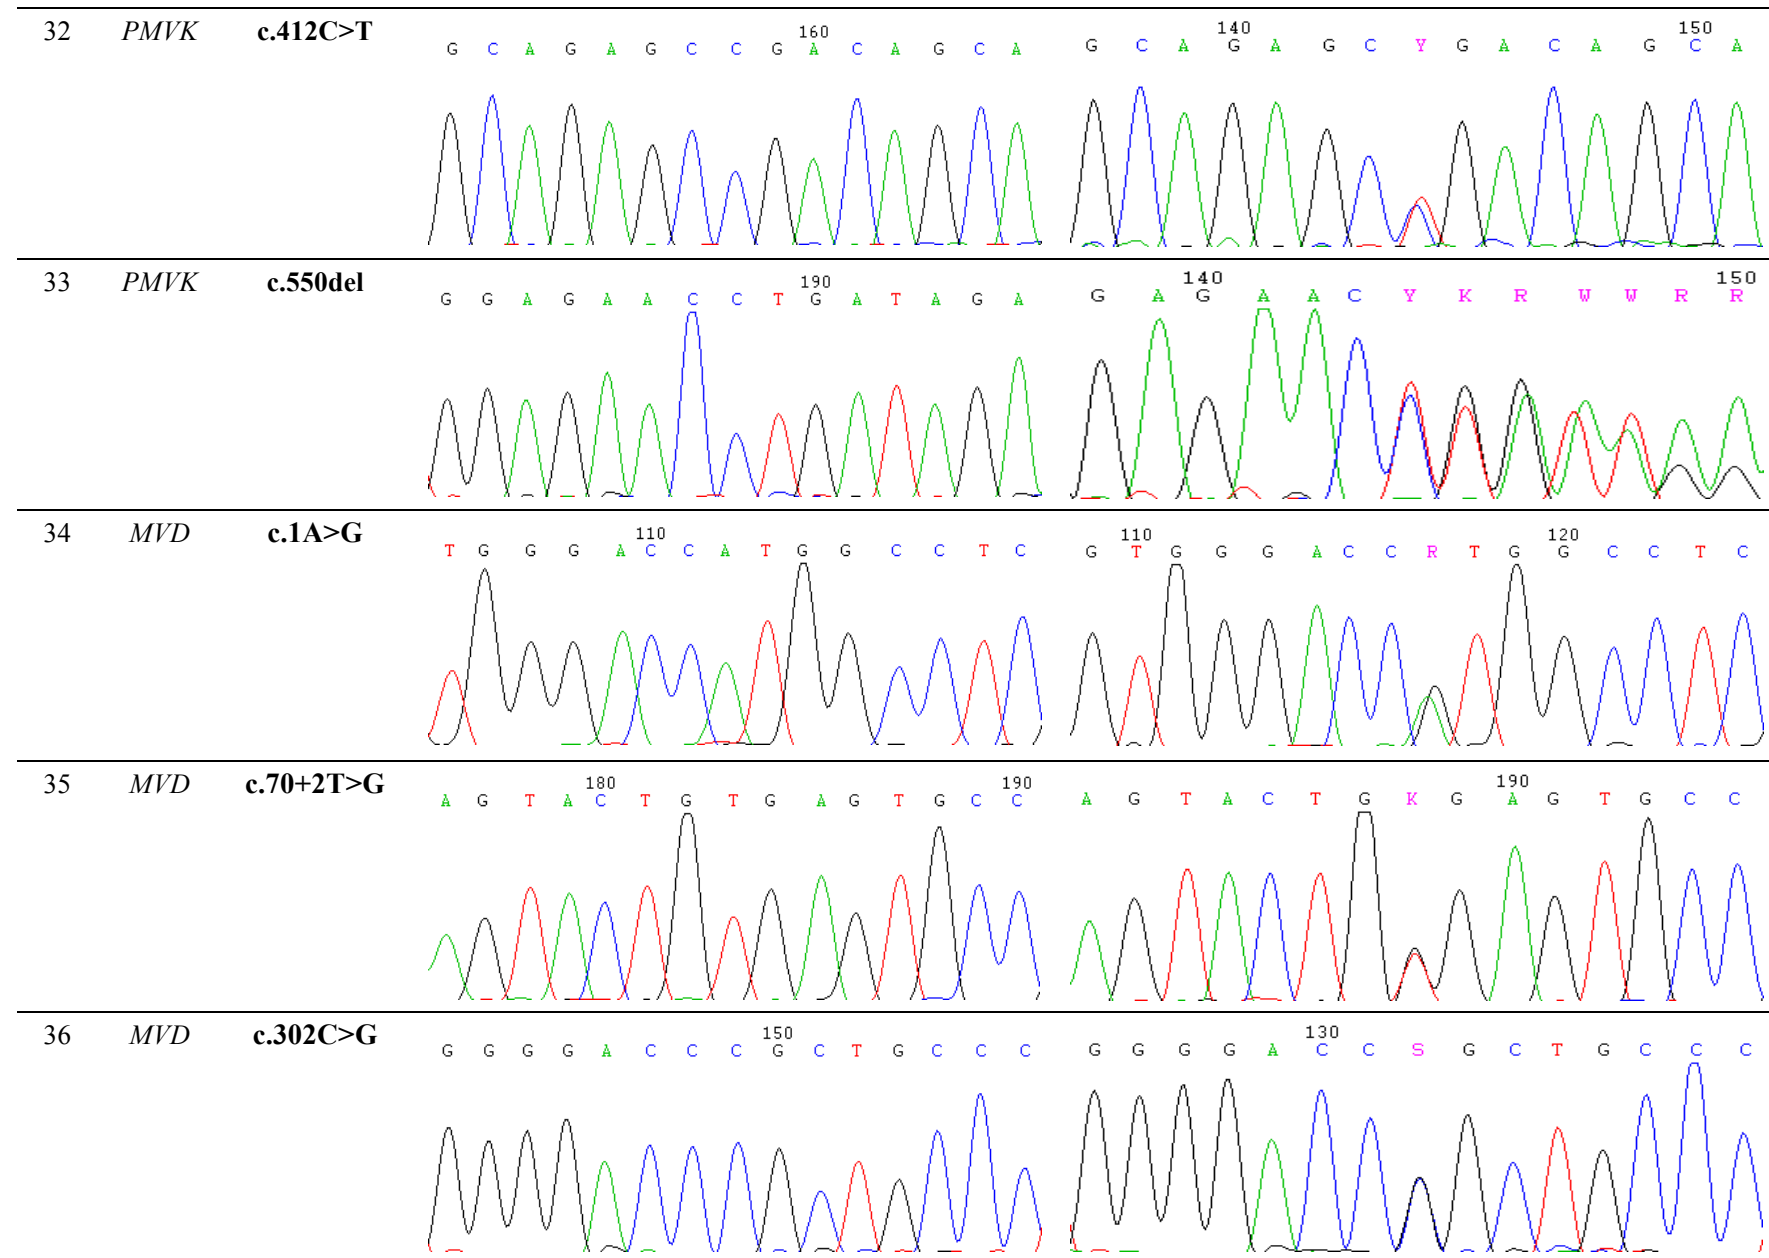



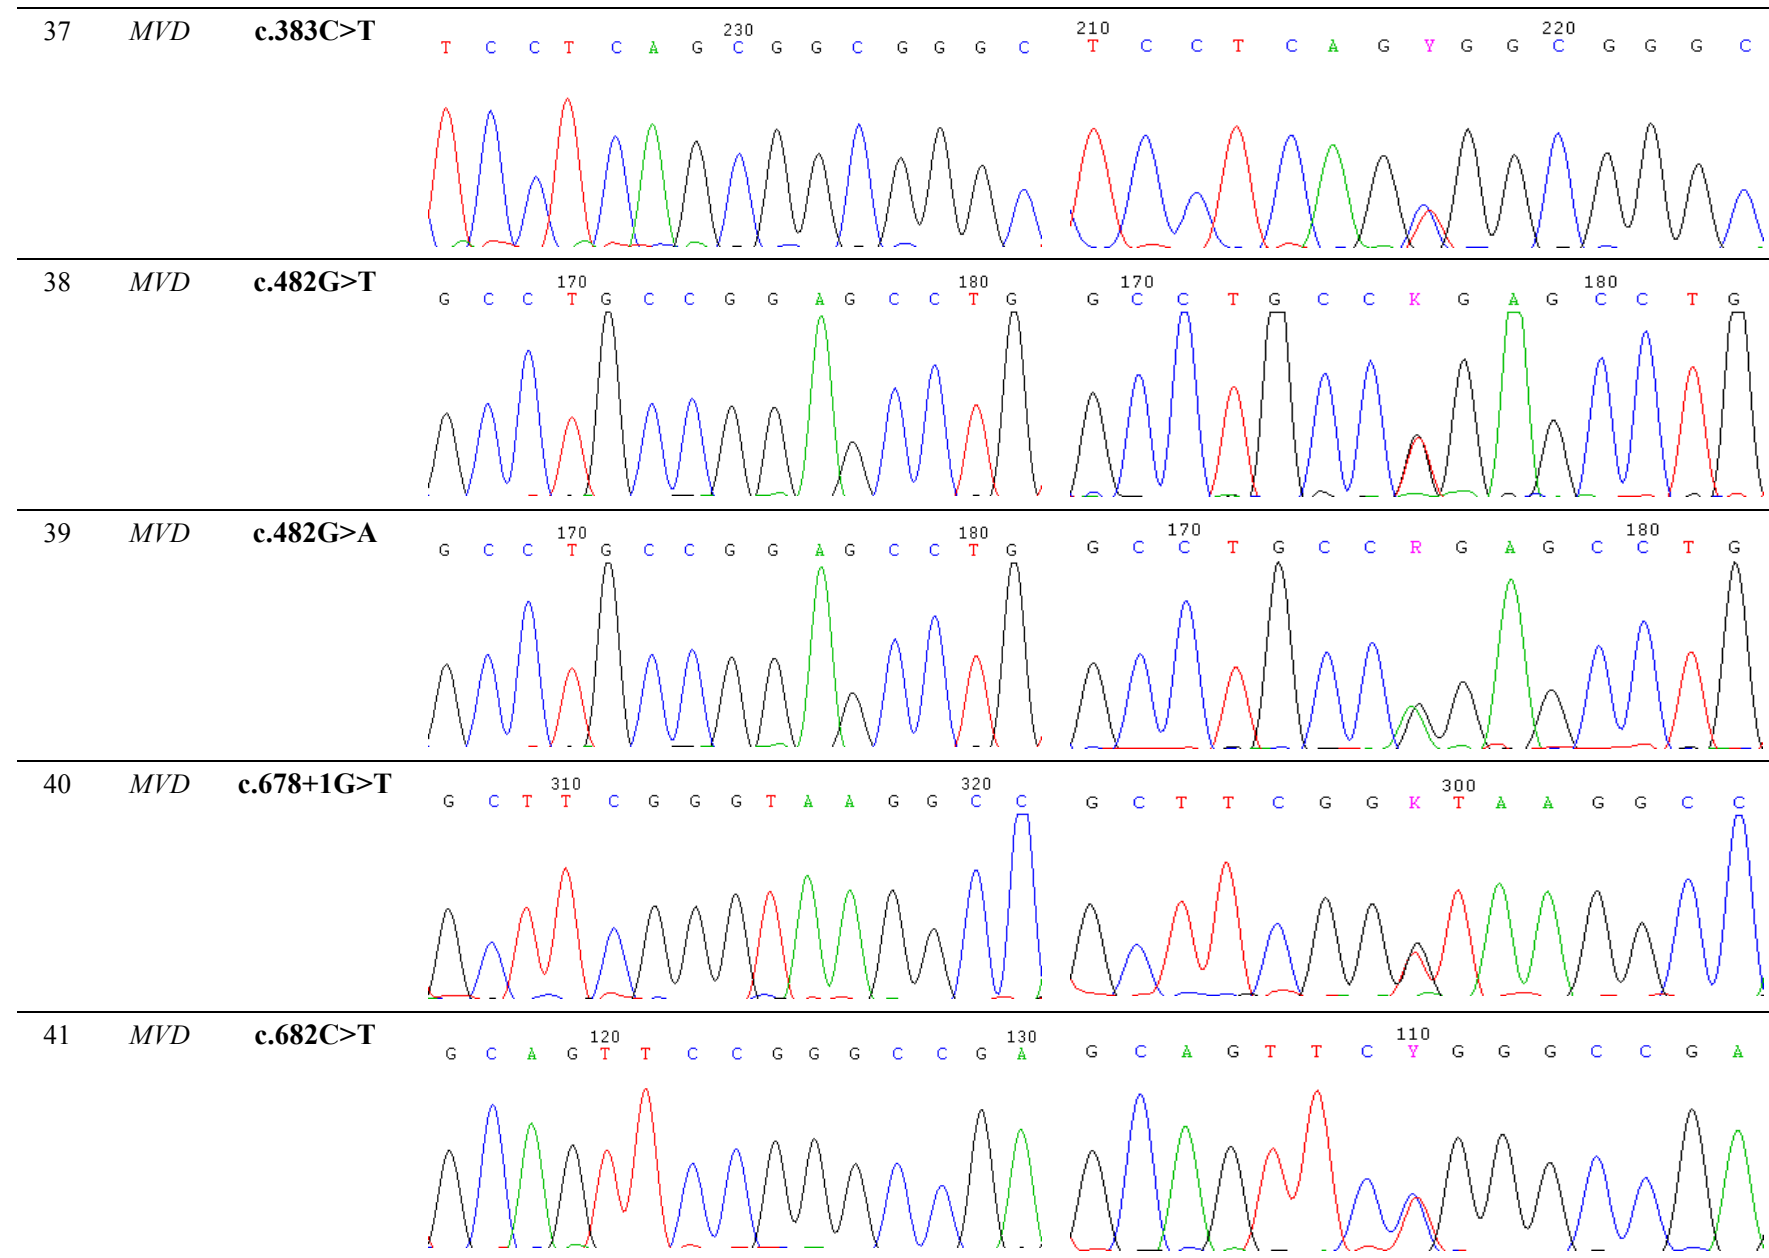

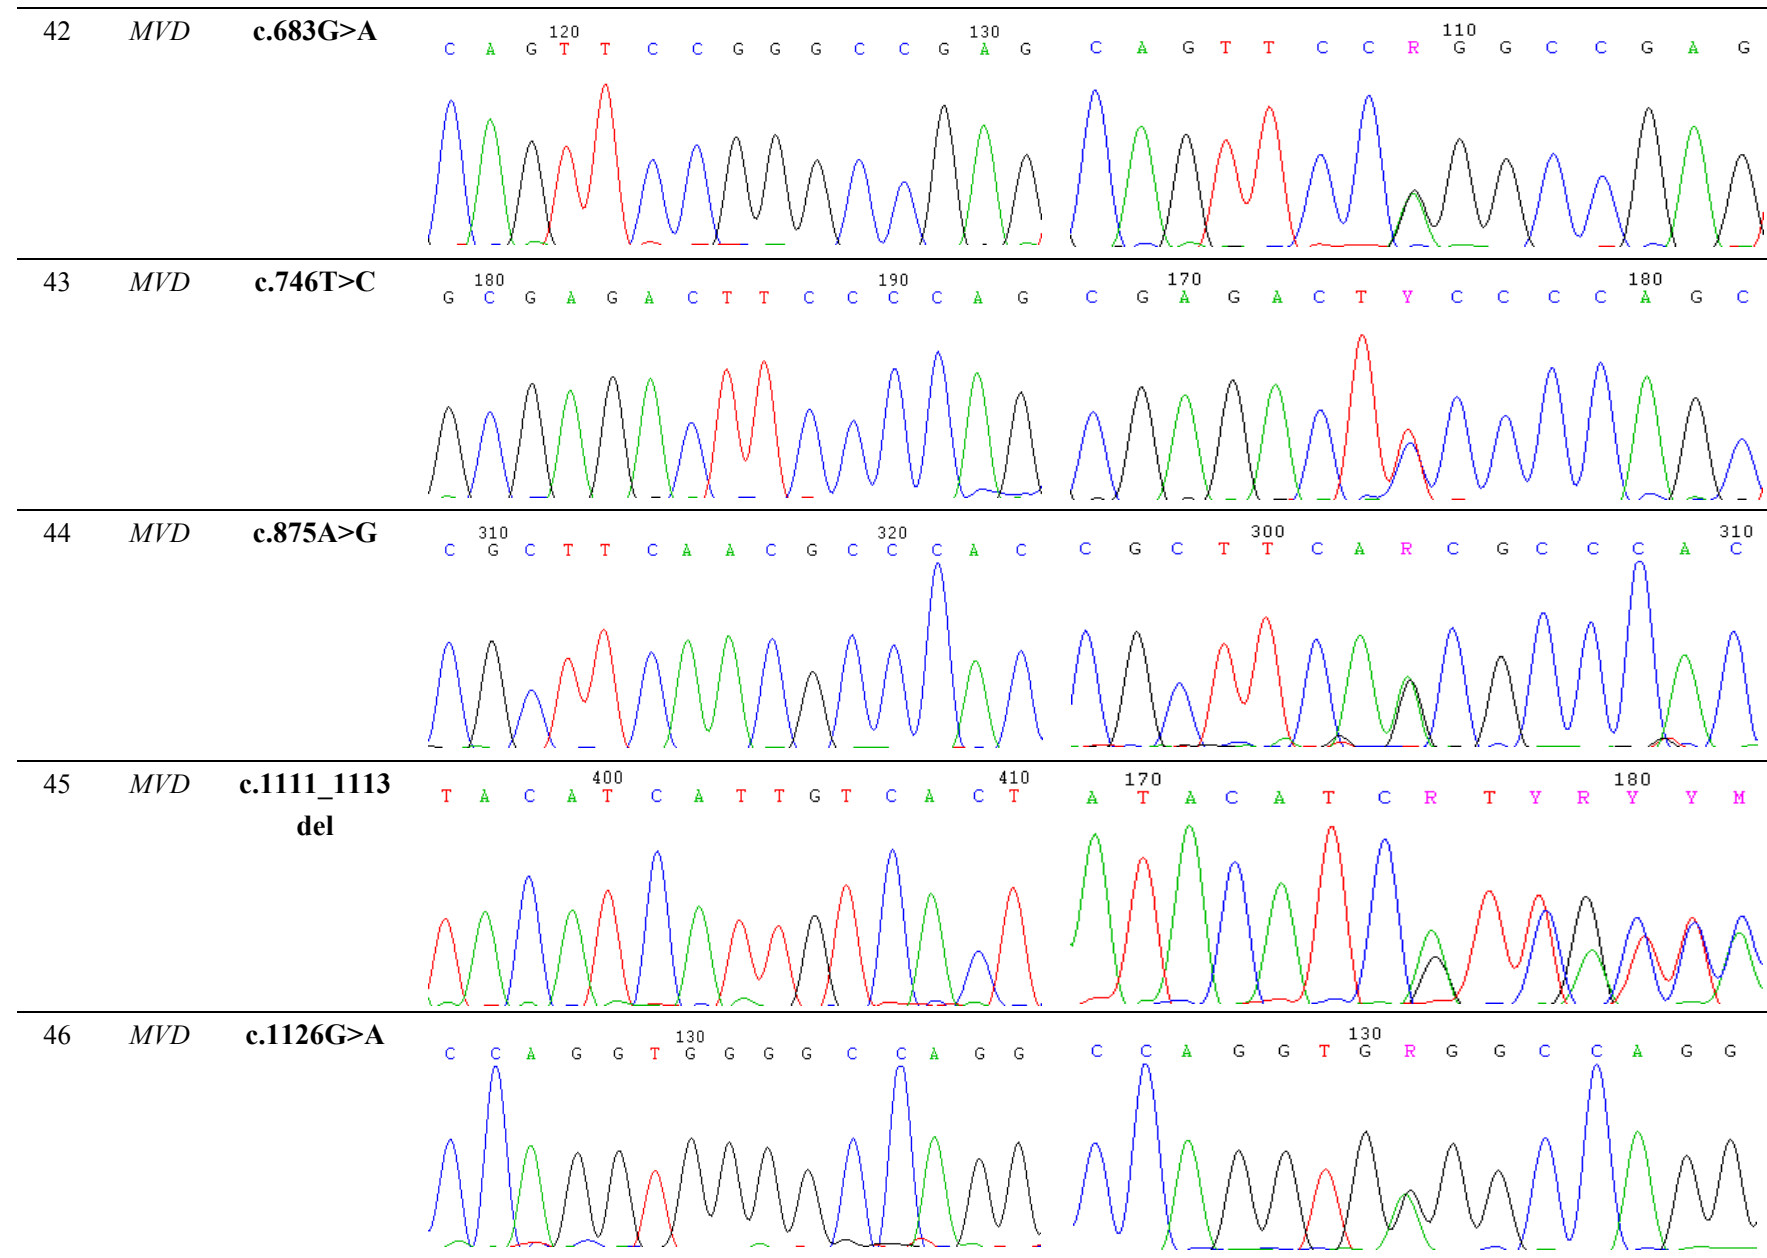

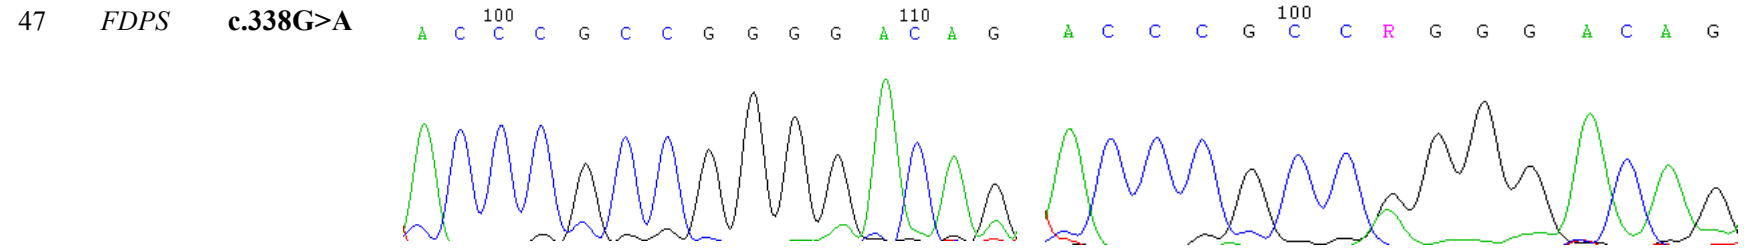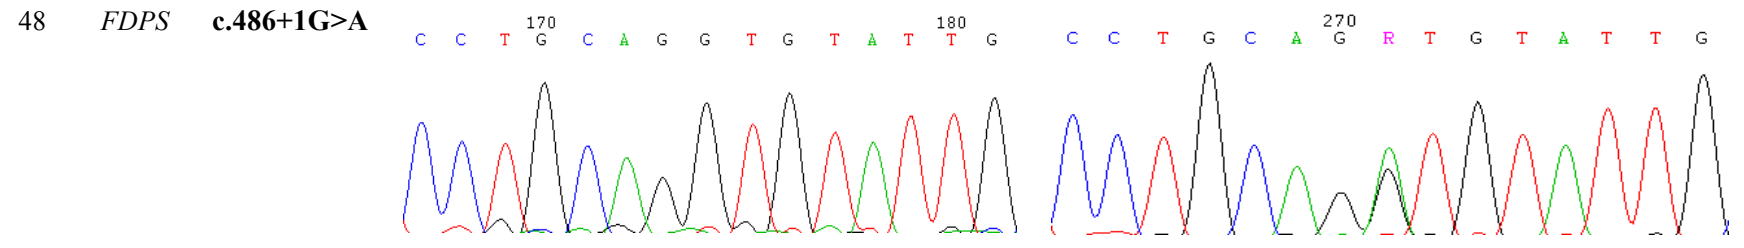

Supplement: elife06322s001.pdf [file elife06322s001.pdf]
